# Supplementary material for: Pregnancy Outcomes in Patients with Primary Sjögren’s Syndrome Undergoing Assisted Reproductive Therapy: A Multi-center Retrospective Study
Source: PubMed Central journal article supplement — Rheumatol Ther. 2023 Oct 24;10(6):1725–39. doi: 10.1007/s40744-023-00608-3 (PMC10654308; doi:10.1007/s40744-023-00608-3), 2023-10-24
Supplement: 40744_2023_608_MOESM1_ESM.pdf [file 40744_2023_608_MOESM1_ESM.pdf]

**Pregnancy outcomes in patients with primary Sjogren's syndrome undergoing assisted reproductive therapy: a multi-center retrospective study**

Authors: Minxi Lao<sup>1,#</sup>, Guangxi Luo<sup>1,#</sup>, Peiyin Dai<sup>1</sup>, Xiaoxue Zhang<sup>2</sup>, Miaoguan Peng<sup>3</sup>, Yuyi Chen<sup>4</sup>, Hao Ren<sup>5</sup>, Xiaodong Wang<sup>2</sup>, Zhongping Zhan<sup>1,\*</sup>, Dongying Chen<sup>1,\*</sup>

<sup>1</sup>Department of Rheumatology, The First Affiliated Hospital of Sun Yat-sen University, Guangzhou, China

<sup>2</sup>Department of Ultrasound, The First Affiliated Hospital of Guangzhou University of Chinese Medicine, Guangzhou, China

<sup>3</sup>Department of Endocrinology, The Third Affiliated Hospital of Guangzhou Medical University, Guangzhou, China

<sup>4</sup>Department of Obstetrics, The Third Affiliated Hospital of Guangzhou Medical University, Guangzhou, China

<sup>5</sup>Department of Rheumatology, Nanfang Hospital of Southern Medical University, Guangzhou, China

<sup>#</sup>Minxi Lao and Guangxi Luo contributed equally to this work.

<sup>\*</sup>Correspondence and reprint requests to: Dongying Chen and Zhongping Zhan. Department of Rheumatology, The First Affiliated Hospital of Sun Yat-sen University, 58 Zhongshan 2<sup>nd</sup> Road, Guangzhou 510080, China.

E-mail address: chendy3@mail.sysu.edu.cn (D. Chen) and zhanzhp@mail.sysu.edu.cn (Z. Zhan).

### Supplementary Table 1.

#### Ethical Approval

| <b>Institution</b>                                                        | <b>Approval Number</b> | <b>Date (Year)</b> |
|---------------------------------------------------------------------------|------------------------|--------------------|
| The First Affiliated Hospital of Sun Yat-sen University                   | [2022]201              | 2022               |
| Guangzhou First People's Hospital                                         | S-2022-082             | 2022               |
| The Third Affiliated Hospital of Guangzhou Medical University             | [2019]113              | 2019               |
| The First Affiliated Hospital of Guangzhou University of Chinese Medicine | [2021]026              | 2021               |
| Nanfang Hospital of Southern Medical University                           | NFFC-2022-166          | 2022               |
